# Supplementary material for: Assessment of Second-Generation Diabetes Medication Initiation Among Medicare Enrollees From 2007 to 2015
Source: PubMed Central journal article supplement (PMC7244990; doi:10.1001/jamanetworkopen.2020.5411), 2020-05-22
Supplement: jamanetwopen-3-e205411-s001.pdf [file jamanetwopen-3-e205411-s001.pdf]

## Supplementary Online Content

Gilstrap LG, Blair RA, Huskamp HA, Zelevinsky K, Normand S-L. Assessment of second-generation diabetes medication initiation among Medicare enrollees from 2007 to 2015. *JAMA Netw Open*. 2020;3(5):e205411.  
doi:10.1001/jamanetworkopen.2020.5411

**eFigure 1.** Consort Diagram

**eTable 1.** A Priori Defined Patient, Prescriber, and Practice Characteristics Adjusted for in the Poisson Random Effect Regression Models to Calculate Interpractice Variation

**eTable 2.** Initiation Drug Choice in 2007 and 2015 and from 2007 to 2015

**eFigure 2.** Time to First Use and Time to Routine Use of Second-Generation Diabetes Drugs, Including Combination Preparations From 2007 to 2015

**eTable 3.** Comparison of Patients Dropped Owing to Small Practice Size or Inability to Attribute to a Practice vs Those Included in Initiation Cohort

**eTable 4.** Comparison of Patients Dropped Owing to Missing Zip Code vs Those Included in Initiation Cohort

This supplementary material has been provided by the authors to give readers additional information about their work.

**eFigure 1. Consort diagram**

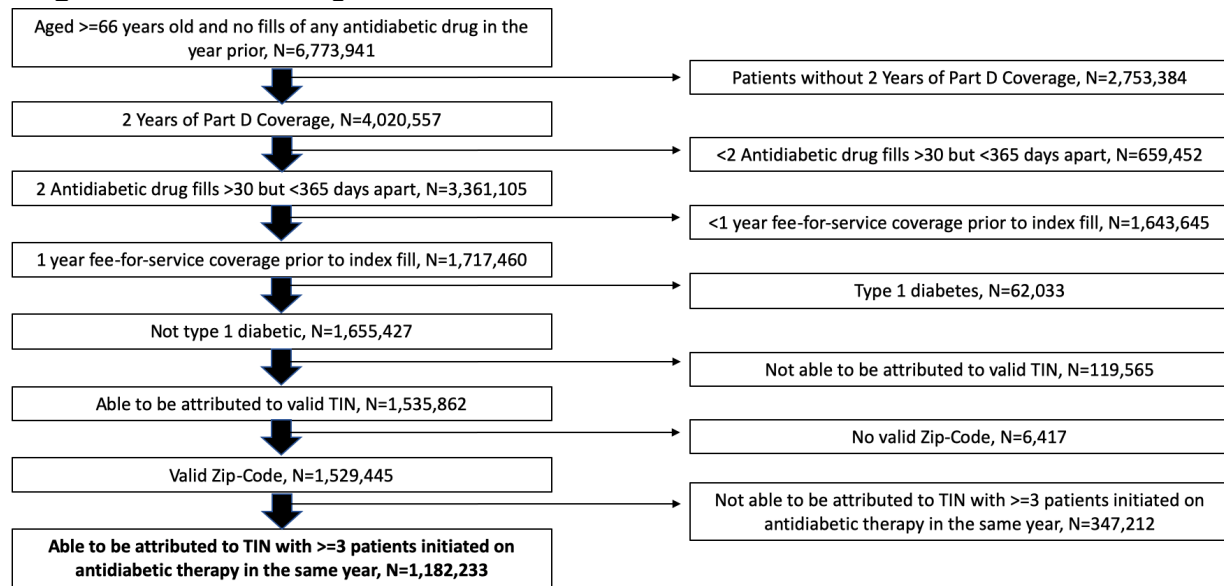

**eTable 1.** A Priori Defined Patient, Prescriber, and Practice Characteristics Adjusted for in the Poisson Random Effect Regression Models to Calculate Interpractice Variation

Patient Characteristics

Demographics: Age, sex, race, dual Medicare/Medicaid eligibility, disability, ZCTA-level % below poverty line, ZCTA-level %with high school degree, median income, geographic region, population density

Comorbidities: Acute myocardial infarction, Atrial fibrillation, Chronic kidney disease, Congestive heart failure, Hyperlipidemia, Hypertension, Ischemic heart disease, Stroke/TIA, Cancer, Hierarchical condition category score

Prescriber Characteristics

Prescriber is an Endocrinologist, Prescriber is a primary care physician (PCP), Prescriber is another type of physician (not endocrinologist or PCP), Prescriber's average panel size, % patients in prescriber's panel with diabetes,

Practice Characteristics

Number of beneficiaries attributed to practice, Number of providers affiliated with practice, Number of beneficiaries per provider in practice, Practice is part of an academic center, Practice is hospital owned

**eTable 2.** Initiation Drug Choice in 2007 and 2015 and from 2007 to 2015

| Initiation Drug                                                      | N      | %     |
|----------------------------------------------------------------------|--------|-------|
| <b>2007</b>                                                          |        |       |
| <b>Initiated on a First-Generation Antidiabetic Drug (n=138516)</b>  |        |       |
| Metformin, n (%)                                                     | 66867  | 46.4  |
| * Sulfonylurea, n (%)                                                | 39095  | 27.2  |
| † Thiazolidinediones, n (%)                                          | 19703  | 13.7  |
| ‡ Alpha-glucosidase Inhibitors, n (%)                                | 204    | 0.1   |
| § Meglitinides, n (%)                                                | 1913   | 1.3   |
| Insulin, n (%)                                                       | 10734  | 7.5   |
| <b>Initiated on a Second-Generation Antidiabetic Drug (n=5468)</b>   |        |       |
| # Amylin Analogue, n (%)                                             | 17     | <0.1  |
| ** GLP-1, n (%)                                                      | 390    | 0.3   |
| †† DPP-4, n (%)                                                      | 5061   | 3.5   |
| ‡‡ SGLT-2, n (%)                                                     | -      | -     |
| <b>2015</b>                                                          |        |       |
| <b>Initiated on a First-Generation Antidiabetic Drug (n=148010)</b>  |        |       |
| Metformin, n (%)                                                     | 107351 | 65.88 |
| * Sulfonylurea, n (%)                                                | 22786  | 13.98 |
| † Thiazolidinediones, n (%)                                          | 2151   | 1.32  |
| ‡ Alpha-glucosidase Inhibitors, n (%)                                | 209    | 0.13  |
| § Meglitinides, n (%)                                                | 977    | 0.6   |
| Insulin, n (%)                                                       | 14536  | 8.92  |
| <b>Initiated on a Second-Generation Antidiabetic Drug (n=14929)</b>  |        |       |
| # Amylin Analogue, n (%)                                             | N/A    | N/A   |
| ** GLP-1, n (%)                                                      | 1377   | 0.85  |
| †† DPP-4, n (%)                                                      | 12181  | 7.48  |
| ‡‡ SGLT-2, n (%)                                                     | 1371   | 0.84  |
| <b>2007-2015 (pooled)</b>                                            |        |       |
| <b>Initiated on a First-Generation Diabetes Drug (n=1,104,718)</b>   |        |       |
| Metformin, n (%)                                                     | 690612 | 58.42 |
| * Sulfonylurea, n (%)                                                | 242126 | 20.48 |
| † Thiazolidinediones, n (%)                                          | 51710  | 4.37  |
| ‡ Alpha-glucosidase Inhibitors, n (%)                                | 1994   | 0.17  |
| § Meglitinides, n (%)                                                | 10140  | 0.86  |
| Insulin, n (%)                                                       | 108136 | 9.15  |
| <b>Initiated on a Second-Generation Antidiabetic Drug (n=77,515)</b> |        |       |
| # Amylin Analogue, n (%)                                             | 64     | <0.1  |
| ** GLP-1, n (%)                                                      | 4989   | 0.42  |
| †† DPP-4, n (%)                                                      | 70471  | 5.96  |
| ‡‡ SGLT-2, n (%)                                                     | 1991   | 0.17  |

All combination drugs where one of the active ingredients is metformin are counted as “metformin” except metformin+sitagliptin which is counted as sitagliptin (DPP-4).

\* Sulfonylureas include: glipizide, glyburide, glimepiride.

† Thiazolidinediones include: rosiglitazone, pioglitazone.

‡ Alpha-glucosidase inhibitors include: acarbose, miglitol.

§ Meglitinides: repaglinide, nateglinide.

|| Insulins include: Short acting - aspart, glulisine, regular, lispro, human (inhaled))and Long acting - NPH, glargine, degludec, detemir.

**eFigure 2.** Time to First Use and Time to Routine Use of Second-Generation Diabetes Drugs, Including Combination Preparations From 2007 to 2015

Time to First Use

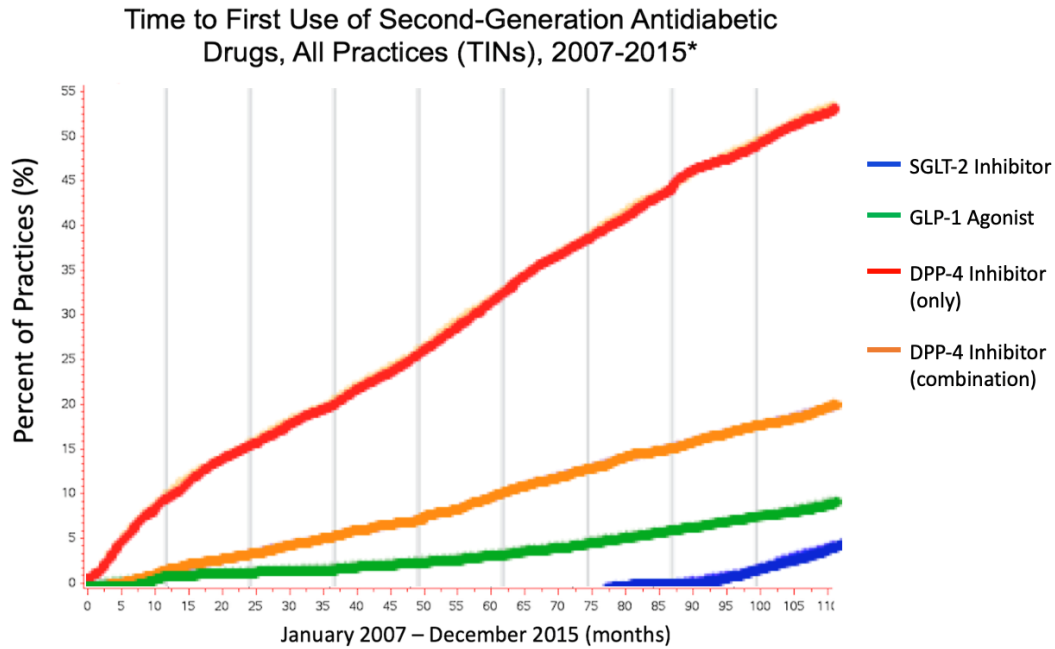

Time to 10% Use

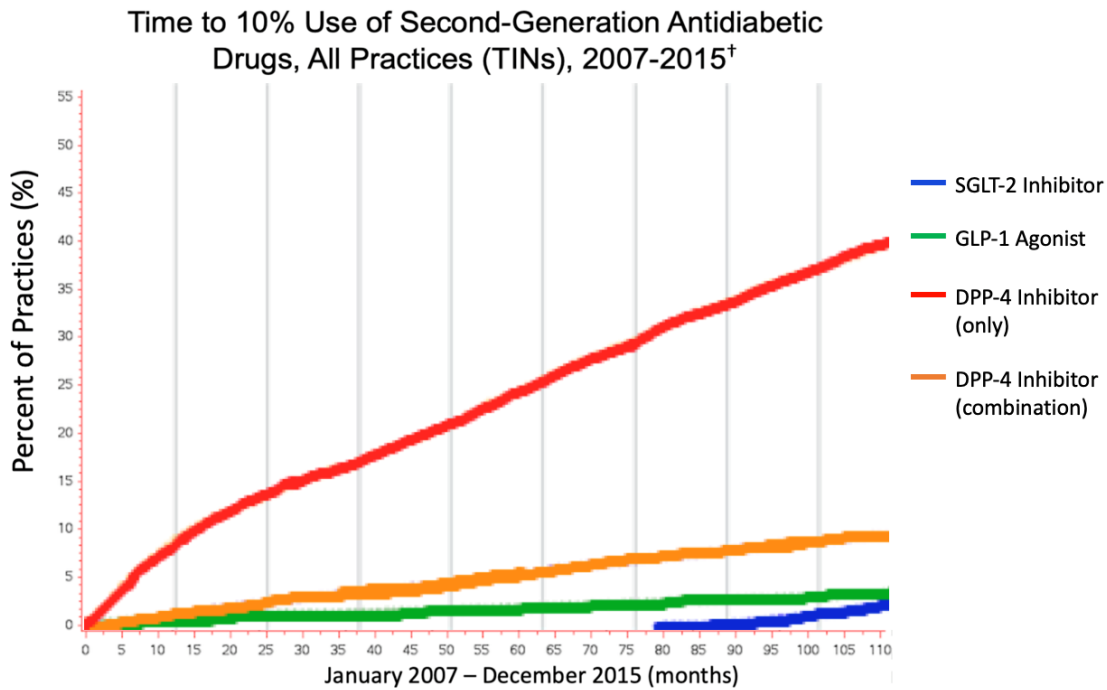

**eTable 3.** Comparison of Patients Dropped Owing to Small Practice Size or Inability to Attribute to a Practice vs Those Included in Initiation Cohort

| Binary Characteristics             | Total N | Overall % | Patients in final cohort |         |                |        |
|------------------------------------|---------|-----------|--------------------------|---------|----------------|--------|
|                                    |         |           | No (excluded)            |         | Yes (included) |        |
|                                    |         |           | N                        | %       | N              | %      |
|                                    |         |           |                          |         |                |        |
| All                                | 1655427 | 100       | 472339                   | 100     | 1182233        | 100    |
| <b>Year of Study</b>               |         |           |                          |         |                |        |
| 2007                               | 206276  | 12.4606   | 62161                    | 13.1603 | 143984         | 12.18  |
| 2008                               | 182972  | 11.0529   | 58967                    | 12.484  | 123855         | 10.48  |
| 2009                               | 172258  | 10.4057   | 55773                    | 11.8078 | 116414         | 9.85   |
| 2010                               | 169379  | 10.2317   | 53040                    | 11.2292 | 116270         | 9.83   |
| 2011                               | 169677  | 10.2497   | 51557                    | 10.9153 | 118053         | 9.99   |
| 2012                               | 168210  | 10.1611   | 49364                    | 10.451  | 118778         | 10.05  |
| 2013                               | 176673  | 10.6724   | 48142                    | 10.1923 | 128472         | 10.87  |
| 2014                               | 201330  | 12.1618   | 47756                    | 10.1105 | 153467         | 12.98  |
| 2015                               | 208652  | 12.6041   | 45579                    | 9.6496  | 162940         | 13.78  |
| Female                             | 951839  | 57.4981   | 279535                   | 59.181  | 671831         | 56.83  |
| Male                               | 703588  | 42.5019   | 192804                   | 40.819  | 510402         | 43.17  |
| <b>Race</b>                        |         |           |                          |         |                |        |
| White                              | 1232440 | 74.4485   | 317612                   | 67.2424 | 914374         | 77.34  |
| Black                              | 168641  | 10.1872   | 63176                    | 13.3751 | 105319         | 8.91   |
| Hispanic                           | 154784  | 9.3501    | 59674                    | 12.6337 | 94937          | 8.03   |
| Other                              | 99562   | 6.0143    | 31877                    | 6.7488  | 67603          | 5.72   |
| <b>Population Density</b>          |         |           |                          |         |                |        |
| Urban                              | 1346357 | 81.3299   | 383774                   | 81.2497 | 962472         | 81.41  |
| Large Rural                        | 148405  | 8.9648    | 35327                    | 7.4792  | 113075         | 9.56   |
| Small Rural                        | 88037   | 5.3181    | 27456                    | 5.8128  | 60578          | 5.12   |
| Isolated                           | 68996   | 4.1679    | 22887                    | 4.8455  | 46108          | 3.90   |
| <b>Geography</b>                   |         |           |                          |         |                |        |
| Northeast                          | 282362  | 17.0567   | 93879                    | 19.8753 | 188450         | 15.94  |
| Midwest                            | 388773  | 23.4848   | 95136                    | 20.1415 | 293551         | 24.83  |
| South                              | 691515  | 41.7726   | 180027                   | 38.1139 | 511327         | 43.25  |
| West                               | 286807  | 17.3253   | 97715                    | 20.6875 | 188905         | 15.98  |
| <b>Socioeconomics (ZCTA-level)</b> |         |           |                          |         |                |        |
| Dual Eligibility                   | 444098  | 26.80%    | 185379                   | 39.20%  | 258524         | 21.90% |
| Disability                         | 227844  | 13.80%    | 72320                    | 15.30%  | 155403         | 13.10% |
| % Poverty                          | 238532  | 14.40%    | 80933                    | 17.10%  | 157401         | 13.30% |
| <b>Comorbidities</b>               |         |           |                          |         |                |        |
| Acute Myocardial Infarction        | 106009  | 6.40%     | 30255                    | 6.41%   | 75706          | 6.40%  |

|                                                           |         |        |        |        |         |        |
|-----------------------------------------------------------|---------|--------|--------|--------|---------|--------|
| <b>Atrial Fibrillation</b>                                | 280085  | 16.90% | 79386  | 16.80% | 200577  | 17.00% |
| <b>Chronic Kidney Disease</b>                             | 455431  | 27.50% | 138807 | 29.40% | 316392  | 26.80% |
| <b>Congestive Heart Failure</b>                           | 592467  | 35.80% | 190624 | 40.40% | 401562  | 34.00% |
| <b>Hyperlipidemia</b>                                     | 1416941 | 85.60% | 385172 | 81.50% | 1031039 | 87.20% |
| <b>Hypertension</b>                                       | 1521818 | 91.90% | 432991 | 91.70% | 1088044 | 92.00% |
| <b>Ischemic Heart Disease</b>                             | 956726  | 57.80% | 278924 | 59.10% | 677313  | 57.30% |
| <b>Stroke/TIA</b>                                         | 305073  | 18.40% | 104650 | 22.20% | 200279  | 16.90% |
| <b>Cancer</b>                                             | 256431  | 15.50% | 68440  | 14.50% | 187840  | 15.90% |
| <b>Provider Characteristics</b>                           |         |        |        |        |         |        |
| <b>Endocrinologist</b>                                    | 49821   | 3.01%  | 9580   | 2.03%  | 40207   | 3.40%  |
| <b>Primary Care Physician</b>                             | 1199441 | 72.50% | 305119 | 64.60% | 893735  | 75.60% |
| <b>Other Provider *<br/>(has outpatient claims)</b>       | 208432  | 12.60% | 68230  | 14.40% | 140076  | 11.80% |
| <b>Hospital Based Provider<br/>(no outpatient claims)</b> | 197733  | 11.90% | 89410  | 18.90% | 108215  | 9.15%  |
| <b>Provider Panel &lt;250</b>                             | 701350  | 42.40% | 280182 | 59.30% | 420779  | 35.60% |
| <b>Provider panel 250-500</b>                             | 589361  | 35.60% | 136726 | 28.90% | 452351  | 38.30% |
| <b>Provider panel &gt;500</b>                             | 364716  | 22.00% | 55431  | 11.70% | 309103  | 26.10% |
| <b>Patients with diabetes in panel &lt;25%</b>            | 265841  | 16.10% | 90806  | 19.20% | 174880  | 14.80% |
| <b>Patients with diabetes in panel 25-50%</b>             | 1063971 | 64.30% | 272963 | 57.80% | 790518  | 66.90% |
| <b>Patients with diabetes in panel &gt;50%</b>            | 325615  | 19.70% | 108570 | 23.00% | 216835  | 18.30% |
| <b>Practice Characteristics</b>                           |         |        |        |        |         |        |
| <b>Hospital Owned</b>                                     | 106009  | 6.40%  | 30255  | 6.41%  | 87721   | 7.42%  |
| <b>Academic Center Affiliated</b>                         | 280085  | 16.90% | 79386  | 16.80% | 56018   | 4.74%  |

| <b>Continuous Characteristics</b>                  |              |            |               |                          |        |        |                |          |        |
|----------------------------------------------------|--------------|------------|---------------|--------------------------|--------|--------|----------------|----------|--------|
|                                                    | Overall Mean | Overall SD | Overall Range | Patients in final cohort |        |        |                |          |        |
|                                                    |              |            |               | No (excluded)            |        |        | Yes (included) |          |        |
|                                                    |              |            |               | Mean                     | SD     | Range  | Mean           | SD       | Range  |
| <b>Age</b>                                         | 75.76        | 7.02       | 44            | 76.57                    | 7.58   | 44     | 75.44          | 6.75     | 42     |
| <b>Percent Poverty</b>                             | 11.88        | 8.36       | 100           | 12.60                    | 8.92   | 100    | 11.59          | 8.10     | 100    |
| <b>Percent with High School Degree</b>             | 84.54        | 9.81       | 100           | 83.64                    | 10.33  | 100    | 84.90          | 9.56     | 100    |
| <b>Median Income (\$)</b>                          | 53324        | 21555      | 242089        | 53168                    | 22536  | 242089 | 53386          | 21151    | 242089 |
| <b>Hierarchical Condition Category Risk Score†</b> | 2.31         | 2.00       | 19            | 2.62                     | 2.29   | 18     | 2.19           | 1.85     | 19     |
| <b>Number of Patients per Practice</b>             | 5065.54      | 9329.41    | 68400         | 212.88                   | 189.19 | 4698   | 6512.51        | 10191.40 | 68393  |

|                                                  |        |        |       |        |        |      |        |        |       |
|--------------------------------------------------|--------|--------|-------|--------|--------|------|--------|--------|-------|
| <b>Number of Providers per Practice</b>          | 122.75 | 417.62 | 14221 | 7.26   | 49.35  | 4275 | 157.19 | 469.60 | 14221 |
| <b>Number of Providers per Patient</b>           | 166.35 | 164.55 | 3228  | 134.78 | 125.67 | 1417 | 175.76 | 173.36 | 3228  |
| <b>Provider Panel Size</b>                       | 362.06 | 262.04 | 4815  | 272.84 | 224.03 | 4217 | 396.11 | 267.43 | 4815  |
| <b>Percent of Provider's Panel with Diabetes</b> | 0.41   | 0.16   | 1     | 0.43   | 0.17   | 1    | 0.40   | 0.16   | 1     |

\* Prescriber has no face-to-face office visits in the outpatient or carrier file

† HCC scores of less than one are considered relatively healthy, higher numbers suggest of more comorbidities and disease complexity

*HCC is hierarchical condition category; SD is standard deviation; TIA is transient ischemic attack*



**eTable 4.** Comparison of Patients Dropped Owing to Missing Zip Code vs Those Included in Initiation Cohort

| Binary Characteristics             | Total N | Overall % | Patients in final cohort |         |                |        |
|------------------------------------|---------|-----------|--------------------------|---------|----------------|--------|
|                                    |         |           | No (excluded)            |         | Yes (included) |        |
|                                    |         |           | N                        | %       | N              | %      |
|                                    |         |           | All                      | 1183088 | 100            | 855    |
| <b>Year of Study</b>               |         |           |                          |         |                |        |
| 2007                               | 144115  | 12.18     | 131                      | 15.32   | 143984         | 12.18  |
| 2008                               | 124005  | 10.48     | 150                      | 17.54   | 123855         | 10.48  |
| 2009                               | 116485  | 9.85      | 71                       | 8.30    | 116414         | 9.85   |
| 2010                               | 116339  | 9.83      | 69                       | 8.07    | 116270         | 9.83   |
| 2011                               | 118120  | 9.98      | 67                       | 7.84    | 118053         | 9.99   |
| 2012                               | 118846  | 10.05     | 68                       | 7.95    | 118778         | 10.05  |
| 2013                               | 128531  | 10.86     | 59                       | 6.90    | 128472         | 10.87  |
| 2014                               | 153574  | 12.98     | 107                      | 12.51   | 153467         | 12.98  |
| 2015                               | 163073  | 13.78     | 133                      | 15.56   | 162940         | 13.78  |
| Female                             | 672304  | 56.83     | 473                      | 55.32   | 671831         | 56.83  |
| Male                               | 510784  | 43.17     | 382                      | 44.68   | 510402         | 43.17  |
| <b>Race</b>                        |         |           |                          |         |                |        |
| White                              | 914828  | 77.33     | 454                      | 53.10   | 914374         | 77.34  |
| Black                              | 105465  | 8.91      | 146                      | 17.08   | 105319         | 8.91   |
| Hispanic                           | 95110   | 8.04      | 173                      | 20.23   | 94937          | 8.03   |
| Other                              | 67685   | 5.72      | 82                       | 9.59    | 67603          | 5.72   |
| <b>Population Density</b>          |         |           |                          |         |                |        |
| Urban                              | 962583  | 81.36     | ****                     | ****    | 962472         | 81.41  |
| Large Rural                        | 113078  | 9.56      | ****                     | ****    | 113075         | 9.56   |
| Small Rural                        | 60581   | 5.12      | ****                     | ****    | 60578          | 5.12   |
| Isolated                           | 46109   | 3.90      | ****                     | ****    | 46108          | 3.90   |
| <b>Geography</b>                   |         |           |                          |         |                |        |
| Northeast                          | 188483  | 15.93     | ****                     | ****    | 188450         | 15.94  |
| Midwest                            | 293637  | 24.82     | ****                     | ****    | 293551         | 24.83  |
| South                              | 511488  | 43.23     | ****                     | ****    | 511327         | 43.25  |
| West                               | 189092  | 15.98     | ****                     | ****    | 188905         | 15.98  |
| <b>Socioeconomics (ZCTA-level)</b> |         |           |                          |         |                |        |
| Dual Eligibility                   | 258719  | 21.90%    | 195                      | 22.80%  | 258524         | 21.90% |
| Disability                         | 155524  | 13.10%    | 121                      | 14.20%  | 155403         | 13.10% |
| % Poverty                          | 157599  | 13.30%    | 198                      | 23.20%  | 157401         | 13.30% |
| <b>Comorbidities</b>               |         |           |                          |         |                |        |
| Acute Myocardial Infarction        | 75754   | 6.40%     | 48                       | 5.61%   | 75706          | 6.40%  |

|                                                           |         |        |     |        |         |        |
|-----------------------------------------------------------|---------|--------|-----|--------|---------|--------|
| <b>Atrial Fibrillation</b>                                | 200699  | 17.00% | 122 | 14.30% | 200577  | 17.00% |
| <b>Chronic Kidney Disease</b>                             | 316624  | 26.80% | 232 | 27.10% | 316392  | 26.80% |
| <b>Congestive Heart Failure</b>                           | 401843  | 34.00% | 281 | 32.90% | 401562  | 34.00% |
| <b>Hyperlipidemia</b>                                     | 1031769 | 87.20% | 730 | 85.40% | 1031039 | 87.20% |
| <b>Hypertension</b>                                       | 1088827 | 92.00% | 783 | 91.60% | 1088044 | 92.00% |
| <b>Ischemic Heart Disease</b>                             | 677802  | 57.30% | 489 | 57.20% | 677313  | 57.30% |
| <b>Stroke/TIA</b>                                         | 200423  | 16.90% | 144 | 16.80% | 200279  | 16.90% |
| <b>Cancer</b>                                             | 187991  | 15.90% | 151 | 17.70% | 187840  | 15.90% |
| <b>Provider Characteristics</b>                           |         |        |     |        |         |        |
| <b>Endocrinologist</b>                                    | 40241   | 3.40%  | 34  | 3.98%  | 40207   | 3.40%  |
| <b>Primary Care Physician</b>                             | 894322  | 75.60% | 587 | 68.70% | 893735  | 75.60% |
| <b>Other Provider *<br/>(has outpatient claims)</b>       | 140202  | 11.90% | 126 | 14.70% | 140076  | 11.80% |
| <b>Hospital Based Provider<br/>(no outpatient claims)</b> | 108323  | 9.16%  | 108 | 12.60% | 108215  | 9.15%  |
| <b>Provider Panel &lt;250</b>                             | 421168  | 35.60% | 389 | 45.50% | 420779  | 35.60% |
| <b>Provider panel 250-500</b>                             | 452635  | 38.30% | 284 | 33.20% | 452351  | 38.30% |
| <b>Provider panel &gt;500</b>                             | 309285  | 26.10% | 182 | 21.30% | 309103  | 26.10% |
| <b>Patients with diabetes in panel &lt;25%</b>            | 175035  | 14.80% | 155 | 18.10% | 174880  | 14.80% |
| <b>Patients with diabetes in panel 25-50%</b>             | 791008  | 66.90% | 490 | 57.30% | 790518  | 66.90% |
| <b>Patients with diabetes in panel &gt;50%</b>            | 217045  | 18.30% | 210 | 24.60% | 216835  | 18.30% |
| <b>Practice Characteristics</b>                           |         |        |     |        |         |        |
| <b>Hospital Owned</b>                                     | 87823   | 7.42%  | 102 | 11.90% | 87721   | 7.42%  |
| <b>Academic Center Affiliated</b>                         | 56087   | 4.74%  | 69  | 8.07%  | 56018   | 4.74%  |

| <b>Continuous Characteristics</b>                  |              |             |                 |                          |            |            |                |              |            |
|----------------------------------------------------|--------------|-------------|-----------------|--------------------------|------------|------------|----------------|--------------|------------|
|                                                    | Overall Mean | Overall SD  | Overall I Range | Patients in final cohort |            |            |                |              |            |
|                                                    |              |             |                 | No (excluded)            |            |            | Yes (included) |              |            |
|                                                    |              |             |                 | Mean                     | SD         | Range      | Mean           | SD           | Range      |
| <b>Age</b>                                         | 75.76        | 7.02        | 44              | 76.57                    | 7.58       | 44         | 75.44          | 6.75         | 42         |
| <b>Percent Poverty</b>                             | 11.88        | 8.36        | 100             | 12.60                    | 8.92       | 100        | 11.59          | 8.10         | 100        |
| <b>Percent with High School Degree</b>             | 84.54        | 9.81        | 100             | 83.64                    | 10.33      | 100        | 84.90          | 9.56         | 100        |
| <b>Median Income (\$)</b>                          | 53324        | 21555       | 24208<br>9      | 53168                    | 22536      | 24208<br>9 | 53386          | 21151        | 24208<br>9 |
| <b>Hierarchical Condition Category Risk Score†</b> | 2.31         | 2.00        | 19              | 2.62                     | 2.29       | 18         | 2.19           | 1.85         | 19         |
| <b>Number of Patients</b>                          | 5065.5<br>4  | 9329.4<br>1 | 68400           | 212.8<br>8               | 189.1<br>9 | 4698       | 6512.5<br>1    | 10191.4<br>0 | 68393      |

|                                                  |        |        |       |        |        |      |        |        |       |
|--------------------------------------------------|--------|--------|-------|--------|--------|------|--------|--------|-------|
| <b>per Practice</b>                              |        |        |       |        |        |      |        |        |       |
| <b>Number of Providers per Practice</b>          | 122.75 | 417.62 | 14221 | 7.26   | 49.35  | 4275 | 157.19 | 469.60 | 14221 |
| <b>Number of Providers per Patient</b>           | 166.35 | 164.55 | 3228  | 134.78 | 125.67 | 1417 | 175.76 | 173.36 | 3228  |
| <b>Provider Panel Size</b>                       | 362.06 | 262.04 | 4815  | 272.84 | 224.03 | 4217 | 396.11 | 267.43 | 4815  |
| <b>Percent of Provider's Panel with Diabetes</b> | 0.41   | 0.16   | 1     | 0.43   | 0.17   | 1    | 0.40   | 0.16   | 1     |

\* Prescriber has no face-to-face office visits in the outpatient or carrier file

† HCC scores of less than one are considered relatively healthy, higher numbers suggest of more comorbidities and disease complexity

*HCC is hierarchical condition category; SD is standard deviation; TIA is transient ischemic attack*
